# Supplementary material for: Strong stacking interactions at large horizontal displacements of tropylium and cyclooctatetraenide ligands of transition metal complexes: crystallographic and DFT study
Source: Royal Society of Chemistry journal article supplement (doi:10.1039/d0ce00501k), 2020-01-01
Supplement: d0ce00501k1.pdf [file d0ce00501k1.pdf]

## SUPPORTING INFORMATION

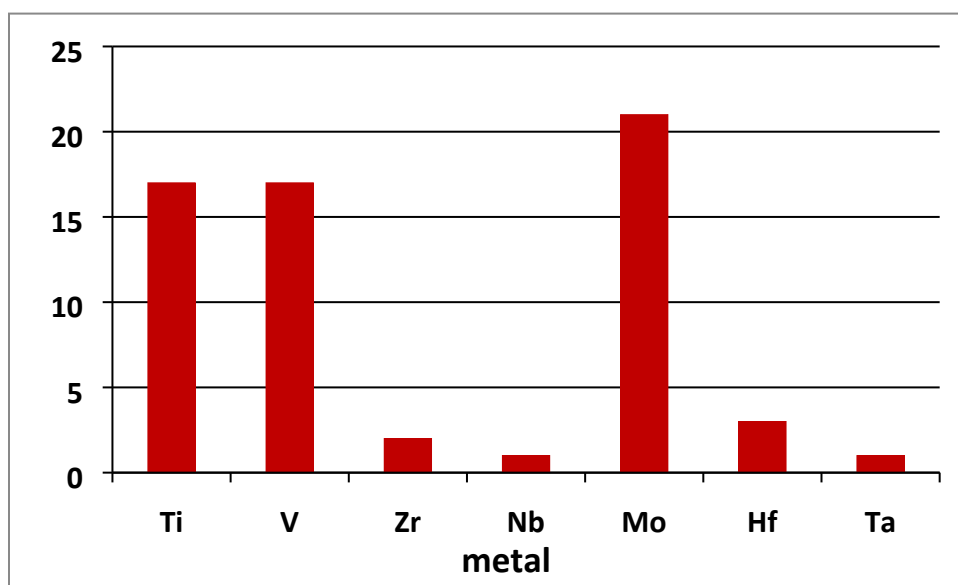

**Figure S1.** Distribution of metals that coordinate tropylium cations that form stacking interactions

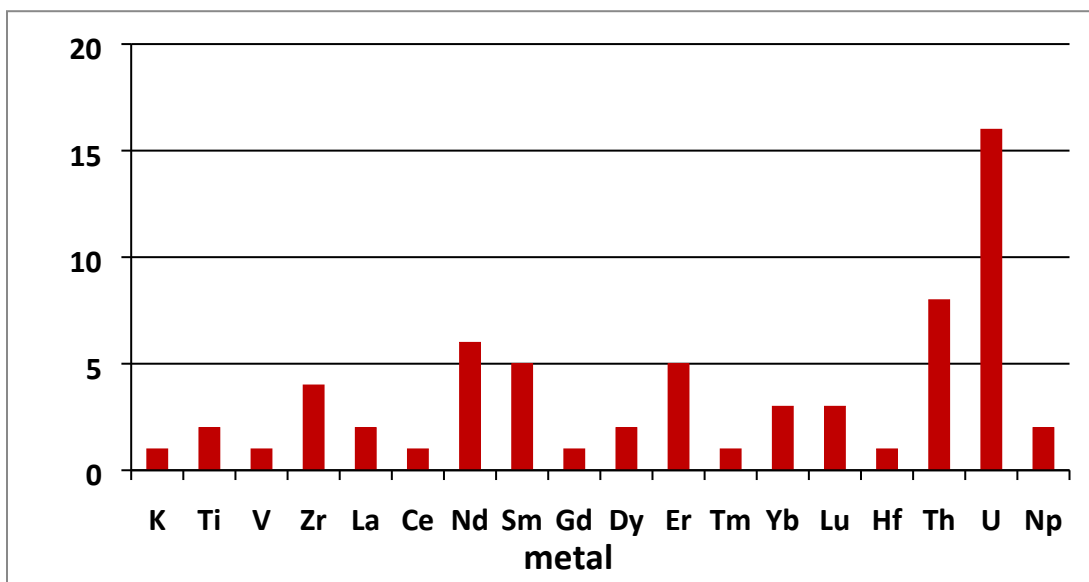

**Figure S2.** Distribution of metals that coordinate cyclooctatetraenide anions (COT) that form stacking interactions

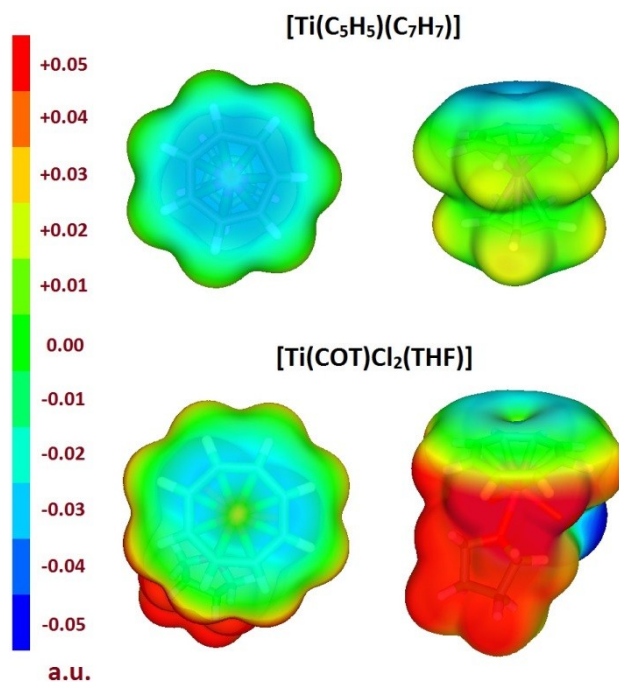

**Figure S3.** Electrostatic potential surfaces of titanium complexes used for calculations of interaction energies between two tropylium/COT ligands (Figure 8 in the main text). Electrostatic potentials were calculated at B97-D2/def2-TZVP level of theory and plotted at the outer contour of electron density of 0.003 a.u.
